# Supplementary material for: SHORT COMMUNICATION: Massive Erosion in Monsoonal Central India Linked to Late Holocene Landcover Degradation
Source: Copernicus journal article supplement (doi:10.5194/esurf-2017-35), 2017-06-20
Supplement: Supplementary file [file esurf-2017-35-RC1-supplement.pdf]

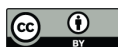

1  
2  
3  
4  
5  
6  
7  
8  
9  
10  
11  
12  
13  
14  
15  
16  
17  
18  
19  
20  
21  
22  
23  
24  
25  
26  
27

**SHORT COMMUNICATION:**  
**Massive Erosion in Monsoonal Central India**  
**Linked to Late Holocene Landcover Degradation**

Liviu Giosan<sup>1</sup>, Camilo Ponton<sup>1,2†</sup>, Muhammed Usman<sup>3</sup>, Jerzy Blusztajn<sup>1</sup>,  
Dorian Fuller<sup>4</sup>, Valier Galy<sup>5</sup>, Negar Haghipour<sup>3</sup>, Joel E. Johnson<sup>6</sup>,  
Cameron McIntyre<sup>3,7,§</sup>, Lukas Wacker<sup>7</sup>, Tim Eglinton<sup>3,5</sup>

<sup>1</sup>Geology & Geophysics, Woods Hole Oceanographic Institution, Woods Hole, MA  
02543, USA

<sup>2</sup>MIT/WHOI Joint Program in Oceanography/Applied Ocean Science and Engineering,  
Cambridge, Massachusetts, USA

<sup>3</sup>Geological Institute, ETH Zürich, 8092 Zürich, Switzerland

<sup>4</sup>Institute of Archaeology, University College London, London, UK

<sup>5</sup>Marine Chemistry & Geochemistry, Woods Hole Oceanographic Institution, Woods  
Hole, MA 02543, USA

<sup>6</sup>Earth Sciences, University of New Hampshire, Durham, New Hampshire, USA

<sup>7</sup>Laboratory of Ion Beam Physics, ETH Zürich, 8093 Zürich, Switzerland

<sup>†</sup>now at Division of Geological and Planetary Sciences, California Institute of  
Technology, 1200 E. California Blvd., Pasadena, CA 91125, USA

<sup>§</sup>now at Scottish Universities Environmental Research Center, E. Kilbride, G75 0QF, UK

Correspondence to: L. Giosan ([lgiosan@whoi.edu](mailto:lgiosan@whoi.edu))



28 Abstract

29 Soil erosion plays a crucial role in transferring sediment and carbon from land to sea, yet  
30 little is known about the rhythm and rates of soil erosion prior to the most recent few  
31 centuries. Here we reconstruct a Holocene erosional history from central India, as  
32 integrated by the Godavari River in a sediment core from the Bay of Bengal. We quantify  
33 terrigenous fluxes, fingerprint sources for the lithogenic fraction and assess the age of the  
34 exported terrigenous carbon. Taken together, our data show that the monsoon decline in  
35 the late Holocene, later exacerbated by the Neolithic adoption and Iron Age  
36 extensification of agriculture on the Deccan Plateau, significantly increased soil erosion  
37 and the age of exported organic carbon. Despite a constantly elevated sea level since the  
38 middle Holocene, this erosion acceleration led to rapid continental margin growth. We  
39 conclude that in monsoon conditions, aridity boosts rather than suppresses sediment and  
40 carbon export acting as a veritable monsoon erosional pump modulated by landcover  
41 conditions.

42

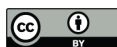

## 43 1. Soil Erosion in the Holocene

44

45 On decadal to millennial timescales, climate is the principal natural control on soil  
46 erosion within a watershed via changes in temperature and precipitation as well as their  
47 impact on vegetation type and cover (Allen and Breshears, 1998; Reichstein et al., 2013).  
48 Global sediment budgets for the Holocene indicate that humans surpassed these natural  
49 controls and became the main driver of soil erosion by at least 2000 years ago  
50 (Montgomery, 2007; Wilkinson and McElroy, 2007; Dotterweich, 2013). Transfer of  
51 sediment, carbon and solutes from land to ocean is of crucial importance for  
52 understanding continental margin architectures as well as carbon and other elemental  
53 cycles. For example, soils contain about two times more carbon than the atmosphere and,  
54 as a result, small changes in the residence time of organic carbon in soils can significantly  
55 affect the atmospheric inventory of carbon dioxide (Lal, 2004). Besides heterotrophic  
56 microbial respiration, erosion is the principal process that releases carbon from soils.  
57 Eroded carbon can subsequently be degraded/reburied along the aquatic continuum to the  
58 ocean (Stallard, 1998; Aufdenkampe et al., 2011; van Oost et al., 2012).

59 In the absence of historical documentation of human impacts, the complexity of soil  
60 erosion hampers the reconstruction of carbon transfer processes prior to the last few  
61 centuries (e.g., Hoffmann et al. 2013; Dotterweich, 2013; Vanwalleghem et al., 2017).  
62 Consequently, global carbon budgets implicitly assume steady state conditions for lateral  
63 transport and carbon degradation along the aquatic continuum in pre-industrial times  
64 (Battin et al., 2009; Regnier et al., 2013; Chappell et al., 2015). In contrast, abundant  
65 archaeological and geological evidence (e.g., van Andel et al., 1990; Bork and Lang,  
66 2003; Bayon et al., 2012; Dotterweich, 2013) as well as modeling (Kaplan et al., 2010;  
67 Wang et al., 2017) suggests widespread impacts of early human landuse on continental  
68 landscapes, soil erosion and associated carbon transfer processes.

69 Here we present a soil erosion history from the Indian peninsula recorded in a sediment  
70 core retrieved near the mouth of Godavari River (Fig. 1) in the Bay of Bengal (NGHP-  
71 01-16A at 16°35.6'N, 82°41.0'E; 1,268 m water depth; Collett et al., 2015). The age  
72 model for the core based on 11 radiocarbon dates on mixed planktonic foraminifera was  
73 previously published by Ponton et al. (2012). The Godavari basin was not affected by  
74 tectonics at the Holocene time scale, or glacial/snow meltwater and strong orographic  
75 precipitation, which augment and complicate the water and sediment discharge of the  
76 larger Himalayan rivers like the Ganges or Brahmaputra. Instead, it integrates rainfall  
77 from the core monsoon zone (CMZ), the region of central India that is representative for  
78 both the mean monsoon regime and its fluctuations over the peninsula (see Ponton et al.,  
79 2012 and references therein). Consequently, over 90% of Godavari's water discharge into  
80 the Bay of Bengal derives from summer monsoon precipitation (Rao et al., 2005), making  
81 its sedimentary deposits a prime target for continental climate reconstructions and a



82 repository for sedimentary proxies of erosion prior and after the Neolithic adoption of  
83 agriculture in central India.

84

## 85 2. The Godavari Sediment System

86 Originating at an elevation of 920 m in the Sahyadri coastal range (*aka* Western Ghats)  
87 near the Arabian Sea coast, the Godavari crosses the entire Indian peninsula toward the  
88 Bay of Bengal (Fig. 1a). Because the coastal range limits penetration of the Arabian Sea  
89 moisture delivered by the monsoon (Gunnell et al. 2007), precipitation in the Godavari  
90 basin primarily originates from the Bay of Bengal. As a result, the climate is most humid  
91 at the coast (i.e., Eastern Ghats range) and becomes increasingly arid toward the interior  
92 on the Deccan Plateau (Fig. 1b). The natural vegetation reflects this gradual decrease in  
93 moisture: the headwaters on the Deccan are dominated by  $C_4$ -plant thornbush savannah  
94 adapted to dry conditions, whereas  $C_3$ -flora (deciduous forests) are dominant in the  
95 Eastern Ghats (Asouti and Fuller, 2008; Fig. 1c).

96 Sediments transported by the Godavari are sourced from two major geological units  
97 (Bikshamaiah and Subramanian, 1980). The upper river basin developed on the Deccan  
98 Traps, a large igneous province consisting of relatively young flood basalts (Cretaceous  
99 to early Neogene) that largely span the Deccan Plateau. The lower river basin developed  
100 over old Proterozoic to Archaean crystalline igneous/metamorphic rocks of the Indian  
101 Craton (Fig. 1d). The relatively young Deccan basalts retain a highly radiogenic mantle-  
102 derived Nd isotope composition ( $\epsilon Nd$  of  $+1 \pm 5$ ) while the old continental crust of the  
103 Indian Craton has a relatively unradiogenic isotopic composition ( $\epsilon Nd$  of  $-35 \pm 8$ ), yielding  
104 a sharp contrast between geological end-members. Thus, the sediment provenance for the  
105 Godavari sediments can be deduced from the Nd isotopic signatures of the detrital  
106 inorganic fraction in our core because the Nd signal remains unmodified through bedrock  
107 weathering processes (McLennan and Hemming, 1992; DePaolo, 1988).

108 Black soils cover the Deccan Plateau whereas red soils are generally typical for the  
109 Eastern Ghats (Bhattacharyya et al., 2003; Fig. 1d). Although both types of soils have  
110 been affected by landuse since prehistorical times, the black soils of the arid to semi-arid  
111 Deccan appear to be the most degraded at present (Singh et al., 1992). Intense soil  
112 erosion within the basin is reflected by the inordinately large sediment load of the  
113 Godavari relative to its water discharge (Bikshamaiah and Subramanian, 1980). In  
114 contrast to the dynamic Himalayan rivers of the Indo-Gangetic alluvial plain, Godavari  
115 and its tributaries are incised in rock or alluvium and have relatively stable sandy  
116 channels. As for other rivers affected by storms (Edwards and Owens, 1991; Hilton et al,  
117 2008), extreme rainfall events are disproportionately important for erosion in the  
118 Godavari watershed and in subsequent transport of sediments to the ocean (Kale, 2003).



119 Given their incised morphology, shifts in channel position in response to floods are  
120 however rare above the Godavari delta (Kale, 2002). Floodplains are limited in extent  
121 (2% of the basin; Bikshamaiah and Subramanian, 1980), and loss of sediments to  
122 overbank deposition is minor (Kale, 2002). Therefore storage is minimal in these  
123 intermediate alluvial reservoirs that normally would increase the residence time of  
124 sediments, including particulate organic carbon.

125 Once reaching the Bay of Bengal, sediment delivered by the Godavari has constructed a  
126 large Holocene delta (Rao et al. 2005). Offshore from the Godavari mouth, a persistent  
127 sediment plume extends over 300 km during the monsoon season when over 90% of the  
128 fluvial sediment is discharged (Sridhar et al., 2008). Because the shelf in front of the delta  
129 is unusually narrow (i.e., under 10 km at our core location) copious sediment deposition  
130 takes place directly on the continental slope, resulting in sediment accumulation rates as  
131 high as 250 cm/kyr; Ponton et al., 2012). This relatively simple sedimentary regime of  
132 the Godavari system in combination with the monsoon-dominated climatology and the  
133 simple geology of the Godavari basin allows for relatively straightforward interpretation  
134 of sediment sources and transfer processes. The monsoon washload is rapidly and  
135 directly delivered to the continental margin without significant trapping in intermediate  
136 depocenters along the river. As the suspended load makes up over 95% of the total  
137 sediment transported by the Godavari (Syvitski and Saito, 2007), the washload-derived  
138 terrestrial proxies are representative for the production of fine-grained sediment in the  
139 basin. Potential contributions from resuspension of shelf sediments cannot be excluded  
140 but are likely minor due to the narrowness of the shelf; furthermore, given the large  
141 sedimentation rates on the shelf itself (Forsberg et al., 2007), the resuspended sediment is  
142 expected to be quasi-contemporaneous with sediments arriving on the slope directly from  
143 the river plume.

### 144 3. Hydroclimate in the Core Monsoon Zone

145 We have previously reconstructed the Holocene paleoclimate using the same sediment  
146 core discussed herein (Ponton et al., 2012; Zorzi et al., 2015). Terrestrial reconstructions  
147 were based on the carbon isotopic compositions of higher plant leaf-wax biomarkers (i.e.,  
148 long-chain *n*-alkanoic acids C<sub>26-32</sub>) and pollen, whereas contemporaneous sea surface  
149 paleoceanographic conditions in front of the Godavari delta came from the oxygen  
150 isotopic composition of planktonic foraminifer *Globigerinoides ruber*. Sedimentary leaf  
151 waxes provide an integrated  $\delta^{13}\text{C}$  record of the flora in the CMZ that document an  
152 increase in aridity-adapted vegetation (C<sub>4</sub> plants) after the monsoon maximum in the  
153 early Holocene (Ponton et al., 2012; Fig. 2). The overall trend of the  $\delta^{13}\text{C}$  leaf wax record  
154 agrees with the view that the seasonality of Northern Hemisphere insolation (Ponton et  
155 al., 2012) led to progressively weaker monsoons over the Holocene. However, two clear  
156 aridification steps are evident: between ~5000 and 4500 years ago, and ~1,700 years ago  
157 (Fig. 2). Pollen from the same core (Zorzi et al., 2015) reinforce these conclusions:



158 coastal forest and mangrove pollen (Fig. 2) that are typical for the more humid coastal  
159 regions of the Eastern Ghats and Godavari delta declined over the Holocene.

160 Dryness-adapted thornbush pollen from the Deccan Plateau increased substantially after  
161 the second aridification step ~1700 years ago, overlapping well with the maximum  
162 contribution of C<sub>4</sub> plant-derived leaf waxes (see Zorzi et al., 2015). For the same time  
163 interval, the ice volume-corrected oxygen isotopic composition of planktonic foraminifer  
164 *Globigerinoides ruber* documented a series of low values interpreted as high salinity  
165 events at the Godavari mouths (see Ponton et al., 2012). Together these continental and  
166 oceanic records suggest that the CMZ aridification intensified in the latest Holocene via a  
167 series of short drier episodes (Ponton et al., 2012). This interpretation is reinforced by  
168 speleothem-derived records from central and northern India for the past thousand years  
169 (Sinha et al., 2011), and the overall evolution of the CMZ hydroclimate as seen from our  
170 core is supported by local reconstructions from the Lonar crater lake in central India  
171 (Prasad et al., 2014; Sarkar et al., 2015) and other records from the larger Indian  
172 monsoon domain (Gupta et al., 2003; Fleitmann et al., 2003; Prasad and Enzel, 2006;  
173 Berkelhammer et al., 2012; Dixit et al., 2014b).

#### 174 4. Erosion in the Godavari Basin

175 The Holocene sediment flux at our core location (Fig. 2) is representative for the  
176 Godavari continental slope (Mazumdar et al., 2009; Ramprasad et al. 2011; Joshi et al.,  
177 2014; Usapkar et al., 2016) and is driven by changes in the siliciclastic sedimentation rate  
178 as dilution by biogenic carbonates is less than 5% (Johnson et al., 2014). Despite a lower  
179 sea level at the time, the flux was relatively small in the early Holocene (~25 g/cm<sup>2</sup>/kyr)  
180 but began to increase after 6000 years ago (~40 g/cm<sup>2</sup>/kyr), as soon as the monsoon  
181 started to decline but well before the adoption of Neolithic agriculture and settlement of  
182 the savannah zone of the central peninsula (~4500 years ago; Fuller, 2011). Between  
183 4000 and 3500 years ago permanent agricultural settlements spread throughout the  
184 Deccan Plateau. The associated small-scale metallurgy (copper-working) requiring  
185 firewood together with the agricultural intensification probably also affected erosion via  
186 widespread deployment of two cropping seasons (Kajale, 1988; Fuller and Madella,  
187 2001). As the climate remained arid, sediment fluxes stayed high despite a phase of  
188 agricultural abandonment and depopulation between ~3,200 and 2,900 years ago  
189 (Dhavalikar, 1984; Roberts et al., 2016).

190 A further step increase in the sediment flux (~90 g/cm<sup>2</sup>/kyr on average) occurred after  
191 ~3000 years ago, this time with no apparent concomitant change in climate. The Nd  
192 isotopic signal points to an increase in the Deccan sedimentary output at the time, after a  
193 muted variability earlier in the Holocene when the Indian Craton consistently provided  
194 ~50-60% of the sediments (Fig. 2; see Supplementary Materials). New improvements in  
195 agricultural technology became widespread in the Deccan Plateau, including use of iron



196 agricultural tools (Mohanty and Selvakumar, 2001) that required firewood-fuelled  
197 smelting Fuller, 2008). A new phase of agricultural settlement began in the middle  
198 Godavari basin (eastern Maharashtra) between ~3000 to ~2800 years ago (Brubaker  
199 2000). However, the largest boost in sediment flux occurred after ~2000 years ago, when  
200 the monsoon reached its driest phase and when further increases in population occurred  
201 resulting in the founding of towns and the first cities of the region at the beginning of the  
202 Historic period (Allchin 1995; Parabrahma Sastry 2003). This doubling in sediment flux  
203 relative to the early Holocene values involved a basin-wide increase in erosion. The  
204 contribution from the Deccan Plateau, although at its maximum according to the Nd  
205 isotope mixing model, only accounts for a 15% shift in sediment source (Fig. 2).

206 Overall, watersheds with high precipitation have higher discharge and discharge  
207 magnitude is considered a primary regulator for sediment and carbon erosional fluxes to  
208 the ocean (e.g., Summerfield and Hulton, 1994; Ludwig et al., 1996; Galy et al., 2015).  
209 However, our Godavari record shows that erosional output is maximized by aridity  
210 because significant rain and seasonal floods still occur during the summer monsoon  
211 season (Mujumdar et al., 1970; Kale, 2003). Aridification and/or agricultural expansion  
212 lead to changes in vegetation type (i.e., forest decrease in favour of savannah) and cover  
213 (i.e., shrinking of naturally vegetated lands in favour of agricultural and/or degrading arid  
214 lands) that exacerbate soil erosion (i.e., Langbein and Schum, 1958; Dunne, 1979;  
215 Walling and Webb, 1983; Istanbuloglu and Bras, 2005; Vanacker et al., 2007; Collins  
216 and Bras, 2008).

## 217 5. Carbon Export from the Godavari Basin

218 The terrigenous organic carbon exported by rivers consists of a mixture of dissolved and  
219 particulate components derived from contemporary vegetation and of carbon stored in  
220 bedrock, soils and fluvial sediments that may be significantly pre-aged (Smittenberg et  
221 al., 2006; Galy and Eglinton, 2011; Feng et al., 2013). On the Godavari slope, the  
222 terrigenous fraction dominates the total organic carbon (TOC) in marine sediments  
223 (Johnson et al., 2014). In agreement with this, TOC radiocarbon ages in our core have  
224 been previously found to be remarkably similar to co-located ages of the strictly  
225 terrigenous higher plant leaf wax fraction (Ponton, 2012). This age similarity also  
226 excludes interferences from within-river biological productivity (e.g., Eglinton and  
227 Hamilton, 1967; Eglinton and Eglinton, 2008). To assess the variability of the terrigenous  
228 carbon age exported by Godavari River based on this understanding we used high  
229 resolution TOC radiocarbon measurements to calculate radiocarbon age offsets relative to  
230 the atmosphere (Soulet et al., 2016; see Supplementary Materials). Over the Holocene,  
231 these biospheric organic carbon radiocarbon age offsets in our core mirror the history of  
232 erosion in the basin (Fig. 2).



233 As a first order observation, TOC ages (Fig. 2 and Supplementary Materials) are  
234 significantly older ( $\sim 200$  to  $2000$   $^{14}\text{C}$  years) than their depositional age in our Godavari  
235 core. Before 5000 years ago the bulk organic carbon radiocarbon age offset were  $\sim 600$   
236  $^{14}\text{C}$  years old on average. In contrast, the highly erosional regime under both climatic and  
237 early human pressure in the late Holocene led to the export of significantly older carbon  
238 from the terrestrial biosphere, i.e.,  $\sim 1300$   $^{14}\text{C}$  on average. This increase in radiocarbon  
239 age offset occurred largely during the two aridification steps identified by Ponton et al.  
240 (2012): more abruptly between  $\sim 5000$  and  $4500$  years ago and more gradually after  
241  $\sim 1700$  years ago (Fig. 2).

242 In the absence of significant storage in alluvial sediments in the Godavari catchment,  
243 several processes can explain the doubling in age offset over the Holocene: an overall  
244 slowing of soil carbon turnover in the drying climate of central India, a decrease in TOC  
245 contribution from contemporaneous vegetation relative to older (pre-aged) soil carbon  
246 input and/or deeper exhumation of soils contributing increasingly older carbon. Given the  
247 drastic changes in vegetation cover and increase in erosion in the Godavari basin, a  
248 decrease in soil turnover is unlikely during the Holocene aridification process (Carvalhais  
249 et al. 2014). In turn, the good agreement between the pollen and leaf-wax  $\delta^{13}\text{C}$  records in  
250 our core (Ponton et al., 2012; Zorzi et al., 2015) with independent monsoon  
251 reconstructions suggests sustained delivery of recently fixed biospheric organic carbon to  
252 the delta. Thus, the doubling in age offset over the Holocene is best explained by  
253 increasing contributions from an older soil component, which could only come through  
254 deeper erosion. Because the age of soil organic carbon in soil profiles increases with  
255 depth (Trumbore, 2009), older mixtures imply a deeper soil erosion, whether uniform, or  
256 through gullies, which are common especially on the Deccan Plateau (Kothyari, 1996).

## 257 6. The Monsoon Erosional Pump

258 Overall, these multiple lines of evidence indicate that soil erosion in the CMZ, as  
259 integrated by the Godavari River, increased throughout the basin immediately as climate  
260 began to dry at the end of mid Holocene, and was further enhanced by Deccan  
261 agricultural activities in the late Holocene. The likely mechanism for this is the extreme  
262 seasonal distribution of the rainfall that characterizes the monsoon (Wang and Ding,  
263 2008), which promoted erosion on the more sparsely vegetated landscapes (Molnar,  
264 2001; DiBiase and Whipple, 2011; Plink-Bjorklund, 2015). Our findings thus point to a  
265 veritable “monsoon erosional pump” that accelerates during minimum landcover  
266 conditions when the protective role of vegetation is reduced, whether naturally or by  
267 humans. The volume of total eroded sediments since the mid Holocene must have been  
268 considerable as the continental margin growth accelerated with the shelf edge aggrading  
269  $\sim 80$  meters in the last  $\sim 2000$  years alone (Forsberg et al., 2007).





270 The monsoon erosional pump must have been active before the Holocene as well,  
271 affecting the transfer of terrigenous sediment, solutes and carbon from land to the ocean.  
272 The beat of monsoon precipitation on orbital timescales is not well constrained but  
273 considered to be modulated by a combination of precession and obliquity frequencies  
274 based on monsoon wind reconstructions (e.g., Clemens and Prell, 2003). Such complex  
275 variability did not inevitably follow the sea level cyclicity (e.g., Goodbred and Kuehl,  
276 2000), which is usually assumed to control most of the sediment transfer from land to the  
277 deep ocean (see Blum and Hattier-Womack, 2009 and references therein). Thus  
278 untangling the effects of the monsoon is difficult especially during the Quaternary (e.g.,  
279 Phillips et al., 2014), but may be easier to discern earlier when the sea level change  
280 magnitude was reduced. Landcover effects are also less likely to occur in the upper  
281 basins of Himalayan monsoonal rivers where elevation (i.e., temperature), orographic  
282 precipitation as well as other sources of water such as snow and glaciers promote  
283 ecological stability (Galy et al., 2008a; but see Olen et al., 2016 for an alternative  
284 viewpoint). However, the erosional pump should still be active in their lower basins  
285 where aridity controls vegetation type and cover (e.g., Galy et al. 2008b).

286 Recent coupled erosion-carbon cycling modeling suggests that long-term anthropogenic  
287 acceleration of erosion has had a significant impact on the global carbon cycle by  
288 intensifying the burial of terrigenous carbon (Wang et al., 2017). Whereas the monsoon  
289 domain only covers ~15% of the Earth's surface (Hsu et al., 2011), it used to export to  
290 the ocean ~70% of the sediment load from the Earth's largest rivers (see Syvitski and  
291 Saito, 2007 for a compilation for pre-damming conditions). Therefore, we suspect that  
292 the cumulative effect of the monsoon erosional pump on the carbon budget was  
293 substantial in augmenting the burial of terrigenous carbon during the Holocene and needs  
294 to be estimated for inclusion in assessments of the net soil–atmosphere carbon exchange.

295

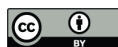

296 References

- 297 Allchin, F. R. (1995) Early cities and states beyond the Ganges Valley. In Allchin, F. R.  
298 (ed.) *The Archaeology of Early Historic South Asia. The Emergence of Cities and*  
299 *States*. Cambridge: Cambridge University Press. pp. 123-151
- 300 Allen, C.D. and Breshears, D.D., 1998. Drought-induced shift of a forest–woodland  
301 ecotone: rapid landscape response to climate variation. *Proceedings of the National*  
302 *Academy of Sciences*, 95(25), pp.14839-14842.
- 303 Asouti, E. and D.Q. Fuller, (2008) *Trees and Woodlands in South India*. Archaeological  
304 Perspectives, Left Coast Press, Walnut Creek, Calif.
- 305 Aufdenkampe, A. K., E. Mayorga, P. A. Raymond, J. M. Melack, S. C. Doney, and S. R.  
306 Alin (2011), Riverine coupling of biogeochemical cycles between land, oceans, and  
307 atmosphere. *Frontiers in Ecology and the Environment* 9(1): 53-60,  
308 doi:10.1890/100014.
- 309 Battin, T.J., Luysaert, S., Kaplan, L.A., Aufdenkampe, A.K., Richter, A. and Tranvik,  
310 L.J., 2009. The boundless carbon cycle. *Nature Geoscience*, 2(9), pp.598-600.
- 311 Bayon, G., Dennielou, B., Etoubleau, J., Ponzevera, E., Toucanne, S. and Bermell, S.,  
312 2012. Intensifying weathering and land use in Iron Age Central Africa. *Science*,  
313 335(6073), pp.1219-1222.
- 314 Berkelhammer, M., Sinha, A., Stott, L., Cheng, H., Pausata, F.S.R., and Yoshimura, K.,  
315 2012, An abrupt shift in the Indian monsoon 4000 years ago, in Giosan, L., et al., eds.,  
316 *Climates, landscapes, and civilizations: American Geophysical Union Geophysical*  
317 *Monograph* 198, p. 75–87, doi:10.1029/2012GM001207
- 318 Bhattacharyya, T. et al., 2003 *Soils of India: historical perspective, classification and*  
319 *recent advances*, *Current Science*, VOL. 104, NO. 10, 1308-1323
- 320 Bikshamaiah, G. and Subramanian, V., 1988. Sediment transport of the Godavari River  
321 basin and its controlling factors. *Journal of Hydrology* 101, 275-290.
- 322 Blum, M.D. and Hattier-Womack, J.I.L.L., 2009. Climate change, sea-level change, and  
323 fluvial sediment supply to deepwater depositional systems. *External Controls on*  
324 *Modern Clastic Turbidite Systems: SEPM, Special Publication*, 92, pp.15-39.
- 325 Bork, H.R. and Lang, A., 2003. Quantification of past soil erosion and land use/land  
326 cover changes in Germany. In *Long term hillslope and fluvial system modelling* (pp.  
327 231-239). Springer Berlin Heidelberg.

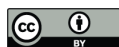

- 328 Brubaker, R. (2000). Aspects of mortuary variability in the South Indian Iron Age.  
329 Bulletin of the Deccan College Research Institute, 60, 253-302.
- 330 Carvalhais, N. et al. Global covariation of carbon turnover times with climate in  
331 terrestrial ecosystems. Nature 514, 213-217 (2014).
- 332 Chappell, A., Baldock, J. and Sanderman, J., 2015. The global significance of omitting  
333 soil erosion from soil organic carbon cycling schemes. Nature Climate Change.
- 334 Clemens, S. C., and W. L. Prell (2003), A 350,000 year summer-monsoon multi-proxy  
335 stack from the Owen Ridge, Northern Arabian Sea, Mar. Geol., 201(1–3), 35–51.
- 336 Collett, T., Riedel, M., Cochran, J., Boswell, R., Presley, J., Kumar, P., Sathe, A., Sethi,  
337 A., Lall, M., and the NGHP Expedition Scientists, 2015, Indian National Gas Hydrate  
338 Program Expedition 01 report: U.S. Geological Survey Scientific Investigations Report  
339 2012–5054, 1442 p..
- 340 Collins, D.B.G. and Bras, R.L., 2008. Climatic control of sediment yield in dry lands  
341 following climate and land cover change. Water Resources Research, 44(10).
- 342 Contreras-Rosales, L.A., Jennerjahn, T., Tharammal, T., Meyer, V., Lückge, A., Paul, A.,  
343 and Schefuß, E., 2014. Evolution of the Indian Summer Monsoon and terrestrial  
344 vegetation in the Bengal region during the past 18 ka. Quaternary Science Reviews,  
345 102, pp.133-148.
- 346 DePaolo, D.J., 1988. Neodymium Isotope Geochemistry, An Introduction. Springer-  
347 Verlag, Berlin, 187 p.
- 348 Dhavalikar, M.K 1984. Towards an Ecological Model for Chalcolithic Cultures of  
349 Central and Western India, Journal of Anthropological Archaeology, 3. 133-158.
- 350 DiBiase, R.A., and Whipple, K.X., 2011, The influence of erosion thresholds and runoff  
351 variability on the relationships among topography, climate, and erosion rate: Journal of  
352 Geophysical Research—Earth Surface, v. 116, no. F4, F04036.
- 353 Dixit, Y.; Hodell, D. A.; Petrie, C. A. (2014), Abrupt weakening of the summer monsoon  
354 in northwest India similar to 4100 yr ago. Geology, 42 (4), 339-342.
- 355 Dotterweich, M., 2013. The history of human-induced soil erosion: Geomorphic legacies,  
356 early descriptions and research, and the development of soil conservation—A global  
357 synopsis. Geomorphology 201, 1–34. doi:10.1016/j.geomorph.2013.07.021



- 358 Dunne, T., 1979, Sediment yield and land use in tropical catchments: *Journal of*  
359 *Hydrology*, v. 42, p. 281–300, doi:10.1016/0022-1694(79)90052-0.
- 360 Edwards, W. M., and Owens, L. B., 1991, Large storm effects on total soil erosion, *J.*  
361 *Soil Water Conserv.*, 46(1), 75–78.
- 362 Eglinton, G.; Hamilton, R. J., Leaf epicuticular waxes, *Science* 1967, 156 (3780), 1322
- 363 Eglinton, T. I.; Eglinton, G. (2008), Molecular proxies for paleoclimatology. *Earth and*  
364 *Planetary Science Letters*, 275 (1-2), 1-16.
- 365 Feng, X. J.; Vonk, J. E.; van Dongen, B. E.; Gustafsson, O.; Semiletov, I. P.; Dudarev, O.  
366 V.; Wang, Z. H.; Montlucon, D. B.; Wacker, L.; Eglinton, T. I. (2013), Differential  
367 mobilization of terrestrial carbon pools in Eurasian Arctic river basins. *Proceedings of*  
368 *the National Academy of Sciences of the United States of America*, 110 (35), 14168-  
369 14173.
- 370 Fleitmann, D., S. J. Burns, M. Mudelsee, U. Neff, J. Kramers, A. Mangini, and A. Matter  
371 (2003), Holocene forcing of the Indian monsoon recorded in a stalagmite from  
372 Southern Oman, *Science*, 300(5626), 1737-1739.
- 373 Forsberg, C. F., A. Solheim, T.J., Kvalstad, R. Vaidya, and S. Mohanty (2007), Slope  
374 instability and mass transport deposits on the Godavari river delta, east Indian margin  
375 from a regional geological perspective, *Submarine Mass Movements and Their*  
376 *Consequences* 27, 19-27.
- 377 Fuller, DQ; (2008) Asia, South: Neolithic cultures. In: *Encyclopedia of Archaeology*. (pp.  
378 756-768)
- 379 Fuller, D. Q. (2011). Finding plant domestication in the Indian subcontinent. *Current*  
380 *Anthropology* 52(SUPPL. 4)
- 381 Fuller, D. Q. and Madella, M. (2001). Issues in Harappan Archaeobotany: Retrospect and  
382 Prospect. In Settar, S., Korisettar, R. (Eds.). *Indian Archaeology in Retrospect, Volume*  
383 *II. Protohistory* (.). New Delhi: Indian Council for Historical Research.
- 384 Galy, V., Eglinton, T.I. (2011), Protracted storage of biospheric carbon in the Ganges-  
385 Brahmaputra basin. *Nature Geoscience*, 4, 843-847.
- 386 Galy, V., François, L., France-Lanord, C., Faure, P., Kudrass, H., Palhol, F. and Singh,  
387 S.K., 2008a. C4 plants decline in the Himalayan basin since the Last Glacial Maximum.  
388 *Quaternary Science Reviews*, 27(13), pp.1396-1409.



- 389 Galy, V., France-Lanord, C., Lartiges, B., 2008b. Loading and fate of particulate organic  
390 carbon from the Himalaya to the Ganga–Brahmaputra delta. *Geochim. Cosmochim.*  
391 *Acta*72, 1767–1787.
- 392 Goodbred, S.L. and Kuehl, S.A., 2000. Enormous Ganges-Brahmaputra sediment  
393 discharge during strengthened early Holocene monsoon. *Geology*, 28(12), pp.1083-  
394 1086.
- 395 Gunnell, Y., K. Anupama, and B. Sultan (2007), Response of the South Indian runoff  
396 harvesting civilization to northeast monsoon rainfall variability during the last 2000  
397 years: instrumental records and indirect evidence, *Holocene*, 17(2), 207-215.
- 398 Gupta, A. K., D. M. Anderson, and J. T. Overpeck (2003), Abrupt changes in the Asian  
399 southwest monsoon during the Holocene and their links to the North Atlantic Ocean,  
400 *Nature*, 421(6921), 354-357.
- 401 Hilton, R. G.; Galy, A.; Hovius, N.; Chen, M.-C.; Horng, M.-J.; Chen, H. (2008),  
402 Tropical-cyclone-driven erosion of the terrestrial biosphere from mountains. *Nature*  
403 *Geoscience*, 1 (11), 759-762.
- 404 Hoffmann, T., et al. (2013), Humans and the missing C-sink: Erosion and burial of soil  
405 carbon through time, *Earth Surf. Dynam.*, 1, 45-52, 2013.
- 406 Hsu, P.C., Li, T. and Wang, B., 2011. Trends in global monsoon area and precipitation  
407 over the past 30 years. *Geophysical Research Letters*, 38(8).
- 408 Istanbuluoglu, E., and Bras, R.L., 2005, Vegetation-modulated landscape evolution:  
409 Effects of vegetation on landscape processes, drainage density, and topography: *Journal*  
410 *of Geophysical Research–Earth Surface*, v. 110, F02012, doi:10.1029/2004jf000249.
- 411 Johnson, J.E., Phillips, S.C., Torres, M.E., Piñero, E., Rose, K.K. and Giosan, L., 2014.  
412 Influence of total organic carbon deposition on the inventory of gas hydrate in the  
413 Indian continental margins. *Marine and Petroleum Geology*, 58, pp.406-424.
- 414 Joshi, R.K., Mazumdar, A., Peketi, A., Ramamurty, P.B., Naik, B.G., Kocherla, M.,  
415 Carvalho, M.A., Mahalakshmi, P., Dewangan, P. and Ramana, M.V., 2014. Gas hydrate  
416 destabilization and methane release events in the Krishna–Godavari Basin, Bay of  
417 Bengal. *Marine and Petroleum Geology*, 58, pp.476-489.
- 418 Kajale MD (1988) Plant Economy. In: Dhavalikar MK, Sankalia HD, Ansari ZD (eds)  
419 Excavations at Inamgaon, Vol. 1, Part 2. Deccan College Postgraduate and Research  
420 Institute, Pune, pp 727–821



- 421 Kale, V. S. (2003). Geomorphic Effects of Monsoon Floods on Indian Rivers. *Natural*  
422 *Hazards*, Springer, 28, 64-84
- 423 Kale, V.S., 2002. Fluvial geomorphology of Indian rivers: an overview. *Progress in*  
424 *Physical Geography* 26, 400–433.
- 425 Kaplan, J. O., Krumhardt, K. M., Ellis, E. C., Ruddiman, W. F., Lemmen, C., and Klein  
426 Goldewijk, K.: Holocene carbon emissions as a result of anthropogenic land cover  
427 change, *The Holocene*, doi:10.1177/0959683610386983, 2010
- 428 Kothyari, U.C., 1996, Erosion and sedimentation problems in India, in *Erosion and*  
429 *Sediment Yield: Global and Regional Perspectives (Proceedings of the Exeter*  
430 *Symposium, July 1996)*. IAHS Publ.no. 236.
- 431 Lal, R. 2004 Soil carbon sequestration impacts on global climate change and food  
432 security, *Science*, 304, 1623–1627 3.
- 433 Langbein, W.B. and Schumm, S.A., 1958. Yield of sediment in relation to mean annual  
434 precipitation. *Eos, Transactions American Geophysical Union*, 39(6), pp.1076-1084.
- 435 Ludwig, W.; Probst, J. L.; Kempe, S. (1996), Predicting the oceanic input of organic  
436 carbon by continental erosion. *Global Biogeochemical Cycles*, 10 (1), 23-41.
- 437 Mazumdar, A.; Dewangan, P.; Joao, H. M.; Peketi, A.; Khosla, V. R.; Kocherla, M.;  
438 Badesab, F. K.; Joshi, R. K.; Roxanne, P.; Ramamurty, P. B.; Karisiddaiah, S. M.; Patil,  
439 D. J.; Dayal, A. M.; Ramprasad, T.; Hawkesworth, C. J.; Avanzinelli, R. (2009),  
440 Evidence of paleo-cold seep activity from the Bay of Bengal, offshore India.  
441 *Geochemistry Geophysics Geosystems*, 10.
- 442 McLennan, S.M., Hemming, S., 1992. Samarium/neodymium elemental and isotopic  
443 systematics in sedimentary rocks. *Geochimica et Cosmochimica Acta* 56, 887–898.
- 444 Mohanty, R. K. and Selvakumar, V. (2001) The archaeology of the Megaliths in India:  
445 1947-1997. In Settar, S and Korisetar, R. (eds.) *Indian Archaeology in Retrospect*,  
446 Vol. 1. Prehistory. New Delhi: Manohar. Pp. 313-352
- 447 Molnar, P. (2001), Climate change, flooding in arid environments, and erosion rates.  
448 *Geology*, 29 (12), 1071-1074.
- 449 Montgomery, D.R., 2007. Soil erosion and agricultural sustainability. *Proceedings of the*  
450 *National Academy of Sciences of the United States of America* 104(33), 13268-13272.

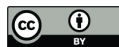

- 451 Mujumdar, G. G., Rajaguru, S. N., and Papu, R. S.: 1970, The recent Godavari Flood  
452 (September 1969) and its relevance to prehistoric archeology, Bull. Deccan College  
453 Res. Inst. 24, 1–17.
- 454 NBSS&LUP (National Bureau of Soil Survey & Land Use Planning of India), 1983,  
455 Soils of India. (Suborder Associations), Map scale 1: 6,300,000, NBSS&LUP, Nagpur.
- 456 Olen, S.M., Bookhagen, B. and Strecker, M.R., 2016. Role of climate and vegetation  
457 density in modulating denudation rates in the Himalaya. Earth and Planetary Science  
458 Letters, 445, pp.57-67.
- 459 Parabrahma Sastry, P. V. (2003) The Early Historic Transition. In Murty, M. L. K. (ed.)  
460 Pre- and Protohistoric Andhra Pradesh up to 500 BC. New Delhi: Orient Longman. pp.  
461 139-147
- 462 Phillips, S.C., Johnson, J.E., Giosan, L. and Rose, K., 2014. Monsoon-influenced  
463 variation in productivity and lithogenic sediment flux since 110 ka in the offshore  
464 Mahanadi Basin, northern Bay of Bengal. Marine and Petroleum Geology, 58, pp.502-  
465 525.
- 466 Plink-Björklund, P., 2015. Morphodynamics of rivers strongly affected by monsoon  
467 precipitation: Review of depositional style and forcing factors. Sedimentary Geology,  
468 323, pp.110-147.
- 469 Ponton, C., 2012. Aridification of the Indian subcontinent during the Holocene:  
470 implications for landscape evolution, sedimentation, carbon cycle, and human  
471 civilizations (Doctoral dissertation, Massachusetts Institute of Technology).
- 472 Ponton C, Giosan L, Eglinton TE et al. (2012) Aridification of India during Holocene.  
473 Geophysical Research Letters 39: L03704.
- 474 Prasad, S., Anoop, A., Riedel, N., Sarkar, S., Menzel, P., Basavaiah, N., Krishnan, R.,  
475 Fuller, D., Plessen, B., Gaye, B. and Röhl, U., 2014. Prolonged monsoon droughts and  
476 links to Indo-Pacific warm pool: A Holocene record from Lonar Lake, central India.  
477 Earth and Planetary Science Letters, 391, pp.171-182.
- 478 Prasad, S., and Y. Enzel (2006), Holocene paleoclimates of India, Quaternary Research.,  
479 66(3), 442-453.
- 480 Ramprasad, T., Dewangan, P., Ramana, M.V., Mazumdar, A., Karisiddaiah, S.M.,  
481 Ramya, E.R. and Sriram, G., 2011. Evidence of slumping/sliding in Krishna–Godavari  
482 offshore basin due to gas/fluid movements. Marine and Petroleum Geology, 28(10),  
483 pp.1806-1816.



- 484 Rao, K.N., Sadakata, N., Malini, B.H. and Takayasu, K., 2005. Sedimentation processes  
485 and asymmetric development of the Godavari delta, India. In Giosan and Bhattacharya,  
486 River Dealtas, SEPM.
- 487 Regnier, P. et al. (2013), Anthropogenic perturbation of the carbon fluxes from land to  
488 ocean. *Nature Geoscience*, 6 (8), 597-607.
- 489 Reichstein M. et al. 2013. Climate extremes and the carbon cycle. *Nature* 500: 287–295.
- 490 Roberts, P., Boivin, N., Petraglia, M., Masser, P., Meece, S., Weisskopf, A., ... & Fuller,  
491 D. Q. (2016). Local diversity in settlement, demography and subsistence across the  
492 southern Indian Neolithic-Iron Age transition: site growth and abandonment at  
493 Sanganakallu-Kupgal. *Archaeological and Anthropological Sciences*, 8(3), 575-599
- 494 Sarkar, S., Prasad, S., Wilkes, H., Riedel, N., Stebich, M., Basavaiah, N. and Sachse, D.,  
495 2015. Monsoon source shifts during the drying mid-Holocene: Biomarker isotope based  
496 evidence from the core ‘monsoon zone’(CMZ) of India. *Quaternary Science Reviews*,  
497 123, pp.144-157.
- 498 Singh, G., R. Babu, P. Narain, L. S. Bhushan, and I. P. Abrol. 1992. Soil erosion rates in  
499 India. *Journal of Soil and Water Conservation* 47 (1): 97-99.
- 500 Sinha, A., L. Stott, M. Berkelhammer, H. Cheng, R. L. Edwards, B. Buckley, M.  
501 Aldenderfer, and M. Mudelsee. 2011. A global context for megadroughts in monsoon  
502 Asia during the past millennium. *Quaternary Science Reviews* 30 (1-2):47-62.
- 503 Soulet, G., Skinner, L.C., Beaupré, S.R. and Galy, V., 2016. A note on reporting of  
504 reservoir  $^{14}\text{C}$  disequilibria and age offsets.
- 505 Smittenberg, R. H.; Eglinton, T. I.; Schouten, S.; Damste, J. S. S. (2006), Ongoing  
506 buildup of refractory organic carbon in boreal soils during the Holocene. *Science*, 314  
507 (5803), 1283-1286.
- 508 Sridhar, P. N., M. M. Ali, P. Vethamony, M. T. Babu, I. V. Ramana, and S. Jayakumar  
509 (2008), Seasonal Occurrence of Unique Sediment Plume in the Bay of Bengal, *EOS*  
510 *Trans. AGU* 89, 22-23.
- 511 Stallard, R. F. (1998), Terrestrial sedimentation and the carbon cycle: Coupling  
512 weathering and erosion to carbon burial. *Global Biogeochemical Cycles*, 12 (2), 231-  
513 257



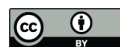

- 514 Summerfield, M.A., and Hulton, N.J., 1994, Natural controls of fluvial denudation rates  
515 in major world drainage basins: *Journal of Geophysical Research*, v. 99, p. 13,871–  
516 13,883, doi:10.1029/94JB00715.
- 517 Syvitski, J.P.M., Saito, Y., 2007. Morphodynamics of deltas under the influence of  
518 humans. *Glob. Planet. Chang.* 57, 261–282.
- 519 Trumbore, S. (2009), Radiocarbon and Soil Carbon Dynamics. *Annual Review of Earth  
520 and Planetary Sciences*, 37, 47-66.
- 521 Vanacker, V., von Blanckenburg, F., Govers, G., Molina, A., Poesen, J., Deckers, J., and  
522 Kubik, P., 2007, Restoring dense vegetation can slow mountain erosion to near natural  
523 benchmark levels: *Geology*, v. 35, no. 4, p. 303–306, doi:10.1130/G23109A.1.
- 524 van Andel, T.H., Zangger, E., and Demitrack, A., 1990, Land use and soil erosion in  
525 prehistoric and historical Greece: *Journal of Field Archaeology*, v. 17, p. 379– 396, doi:  
526 10.2307/530002.
- 527 van Oost, K.; Verstraeten, G.; Doetterl, S.; Notebaert, B.; Wiaux, F.; Broothaerts, N.; Six,  
528 J. (2012), Legacy of human-induced C erosion and burial on soil-atmosphere C  
529 exchange. *Proceedings of the National Academy of Sciences of the United States of  
530 America*, 109 (47), 19492-19497.
- 531 Vanwalleghem, T., Gómez, J.A., Infante Amate, J., González de Molina, M.,  
532 Vanderlinden, K., Guzmán, G., Laguna, A., Giráldez, J.V., 2017. Impact of historical  
533 land use and soil management change on soil erosion and agricultural sustainability  
534 during the Anthropocene, *Anthropocene* 17: 13–29.
- 535 Walling DE, Webb BW. 1983. Patterns of sediment yields. In *Background to  
536 Paleohydrology*, ed. Gregory KJ, pp. 69–100. London, John Wiley & Sons
- 537 Wang, B. and Ding, Q., 2008. Global monsoon: Dominant mode of annual variation in  
538 the tropics. *Dynamics of Atmospheres and Oceans*, 44(3), pp.165-183.
- 539 Wang, Z. et al., 2017. Human-induced erosion has offset one-third of carbon emissions  
540 from land cover change, *Nature Climate Change* 7, 345–349.
- 541 Wilkinson, B. H. and McElroy, B. J.: The impacts of humans on continental erosion and  
542 sedimentation, *Geol. Soc. Am. Bull.*, 119, 140–156, 2007.
- 543 Zorzi, C., Goñi, M.F.S., Anupama, K., Prasad, S., Hanquiez, V., Johnson, J. and Giosan,  
544 L., 2015. Indian monsoon variations during three contrasting climatic periods: The



545      Holocene, Heinrich Stadial 2 and the last interglacial–glacial transition. Quaternary  
546      Science Reviews, 125, pp. 50-60.

547



548

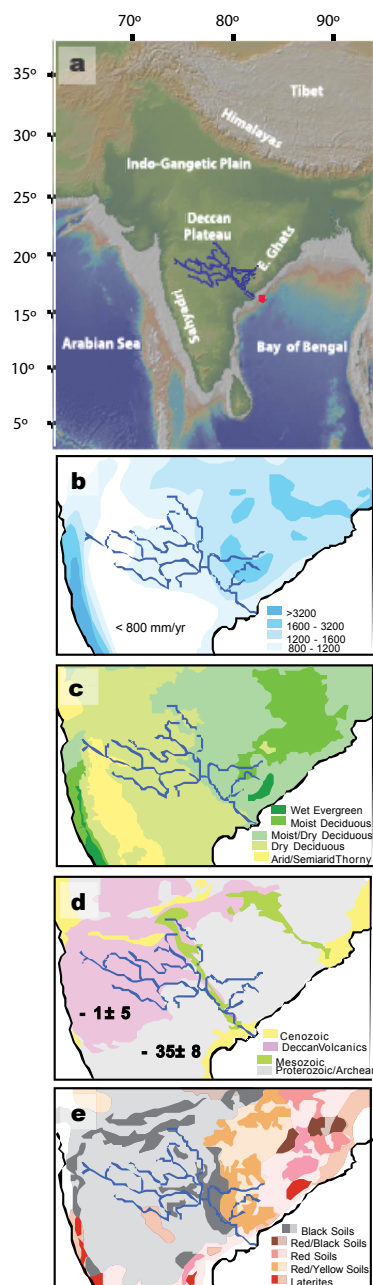

Figure 1. Godavari River drainage basin in its (a) physiographical, (b) hydroclimatic (Asouti and Fuller, 2008), (c) ecological (Asouti and Fuller, 2008), (d) geological (Bikshamaiah and Subramanian, 1980) and (e) soil cover context (NBSS&LUP, 1983). Core NGHP-01-16A location is indicated in (a) by the red dot. Average bedrock  $\epsilon Nd$  values are shown in (d).

549  
 550  
 551  
 552  
 553



554  
555  
556  
557  
558  
559  
560  
561

Figure 2. Paleoenvironmental reconstructions from core NGHP-01-16A for the CMZ as integrated by the Godavari River: (a) Sediment fluxes as mass accumulation rates and sediment sources from Nd isotope fingerprinting (Deccan Trap sediment contribution is estimated from a two-end member model; see text and Supplementary Materials); (b) TOC radiocarbon age offset relative to depositional age; (c) Hydroclimate and ecology from pollen (Zorzi et al., 2015) and leaf wax carbon isotopes (Ponton et al., 2012).

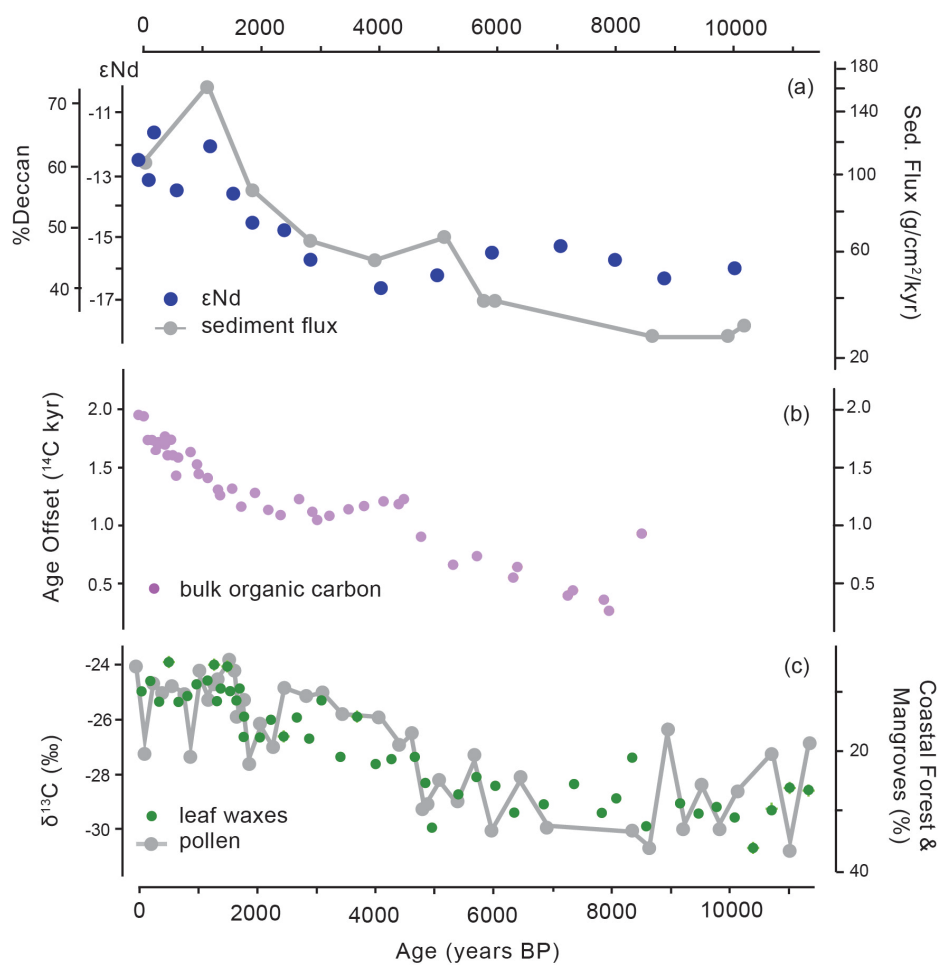

562  
563  
564  
565  
566
